# Supplementary material
Source: PubMed Central journal article supplement (PMC7002246)

# **Assessment of Bias in Estimates of Sexual Network Degree using Prospective Cohort Data**

Supplemental Appendix

**eFigure 1.** Partner-Level Survey Questions in a Study of Black and White Men Who Have Sex with Men, Atlanta, 2010–2014.

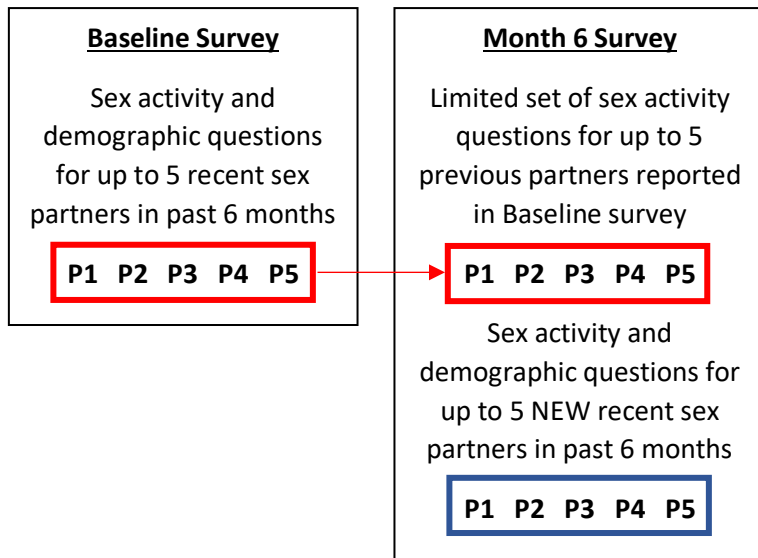

#### Select Sex Activity Questions for Baseline Partners

Did you have sex with [name] once, or more than once during the last 6 months?

*Once*

*More than once*

When did you first have sex with [name]?

*Calendar date or month and year*

When did you last have sex with [name]?

*Calendar date or month and year*

Do you think you will have sex with [name] again?

*Yes*

*No*

*Not sure*

Is/was [NAME] someone that you feel or felt committed to above all others (someone you might call your boyfriend, significant other, life partner, or husband)?

*Yes*

*No*

*Don't know*

#### Select Sex Activity Questions for Previous Baseline Partners at Month 6

Since your last visit with us, have you had anal or oral sex with [name] again?

*Yes*

*No*

*I'm not sure who [name] is*

Have you had unprotected vaginal or anal sex with [name] since your last visit with us?

*Yes*

*No*

*Don't know*

Please enter the date of when you last had sex with [name].

The last time you had sex with [name], did you know his HIV status?

*Yes*

*No*

*Don't know*

What was [name]'s HIV status at that time?

*HIV negative*

*HIV positive*

Since your last visit with us, during the time period when you were sexually involved with [name], with how many other people did you have sex?

*Enter #*

Since your last visit with us, during the time period when you were sexually involved with [name], did [name] have sex with anyone else?

*Yes*

*No*

*Don't know*

In the last six months, how many times have you had anal sex with [name]?

*Dropdown menu options: 1,2,3,4,5,6,7,8,9,10, More than 10*

About how often did you have anal sex with [name] in the last six months?

*About once a month*

*2 or 3 times a month*

*About once a week*

*2 or 3 times a week*

*More than 3 times a week*

**eTable 1.** Distribution of Study Participants by Baseline and Confirmed Degree, by Partnership History, in a Study of Black and White Men Who Have Sex with Men, Atlanta, 2010–2014.

|                                      | Main or Casual (n = 405) <sup>1</sup> |      | Any Main (n = 220) <sup>2</sup> |      | Any Casual (n = 299) <sup>3</sup> |      |
|--------------------------------------|---------------------------------------|------|---------------------------------|------|-----------------------------------|------|
|                                      | n                                     | %    | n                               | %    | n                                 | %    |
| <b>Baseline Degree</b>               |                                       |      |                                 |      |                                   |      |
| <i>Unknown = No<sup>4</sup></i>      |                                       |      |                                 |      |                                   |      |
| 0                                    | 159                                   | 39.3 | 97                              | 44.1 | 145                               | 48.5 |
| 1                                    | 176                                   | 43.5 | 119                             | 54.1 | 110                               | 36.8 |
| 2                                    | 49                                    | 12.1 | 4                               | 1.8  | 30                                | 10.0 |
| 3                                    | 15                                    | 3.7  | 0                               | 0.0  | 10                                | 3.3  |
| 4                                    | 5                                     | 1.2  | 0                               | 0.0  | 3                                 | 1.0  |
| 5                                    | 1                                     | 0.2  | 0                               | 0.0  | 1                                 | 0.3  |
| <i>Unknown = Missing<sup>5</sup></i> |                                       |      |                                 |      |                                   |      |
| 0                                    | 64                                    | 27.6 | 56                              | 32.2 | 51                                | 31.9 |
| 1                                    | 117                                   | 50.4 | 114                             | 65.6 | 71                                | 44.4 |
| 2                                    | 34                                    | 14.7 | 4                               | 2.3  | 26                                | 16.2 |
| 3                                    | 11                                    | 4.7  | 0                               | 0.0  | 8                                 | 5.0  |
| 4                                    | 5                                     | 2.2  | 0                               | 0.0  | 3                                 | 1.9  |
| 5                                    | 1                                     | 0.4  | 0                               | 0.0  | 1                                 | 0.6  |
| <b>Confirmed Degree</b>              |                                       |      |                                 |      |                                   |      |
| 0                                    | 219                                   | 54.1 | 121                             | 55.0 | 191                               | 63.9 |
| 1                                    | 147                                   | 36.3 | 96                              | 43.6 | 89                                | 29.8 |
| 2                                    | 32                                    | 7.9  | 3                               | 1.4  | 16                                | 5.4  |
| 3                                    | 7                                     | 1.7  | 0                               | 0.0  | 3                                 | 1.0  |
| 4                                    | 0                                     | 0.0  | 0                               | 0.0  | 0                                 | 0.0  |
| 5                                    | 0                                     | 0.0  | 0                               | 0.0  | 0                                 | 0.0  |

<sup>1</sup> Study participants who had any main or any casual partnerships in the 6 months prior to the baseline survey; degree is the sum of main and casual partnerships that were ongoing

<sup>2</sup> Study participants who had any main partnerships in the 6 months prior to the baseline survey; degree is the sum of main partnerships that were ongoing

<sup>3</sup> Study participants who had any casual partnerships in the 6 months prior to the baseline survey; degree is the sum of casual partnerships that were ongoing

<sup>4</sup> Responses for unknown baseline degree were coded as not ongoing.

<sup>5</sup> Responses for unknown baseline degree were coded as missing and observations dropped from the model.

**eFigure 2.** Confirmed degree as a function of baseline degree, and race and age of the study participant. Dashed line with a slope of 1 displays the value where baseline degree perfectly predicts confirmed degree. Predictions below the dashed line indicate baseline degree overestimated confirmed degree. Lines/dots display the point estimates and grey polygons display the 95% confidence intervals around the estimates.

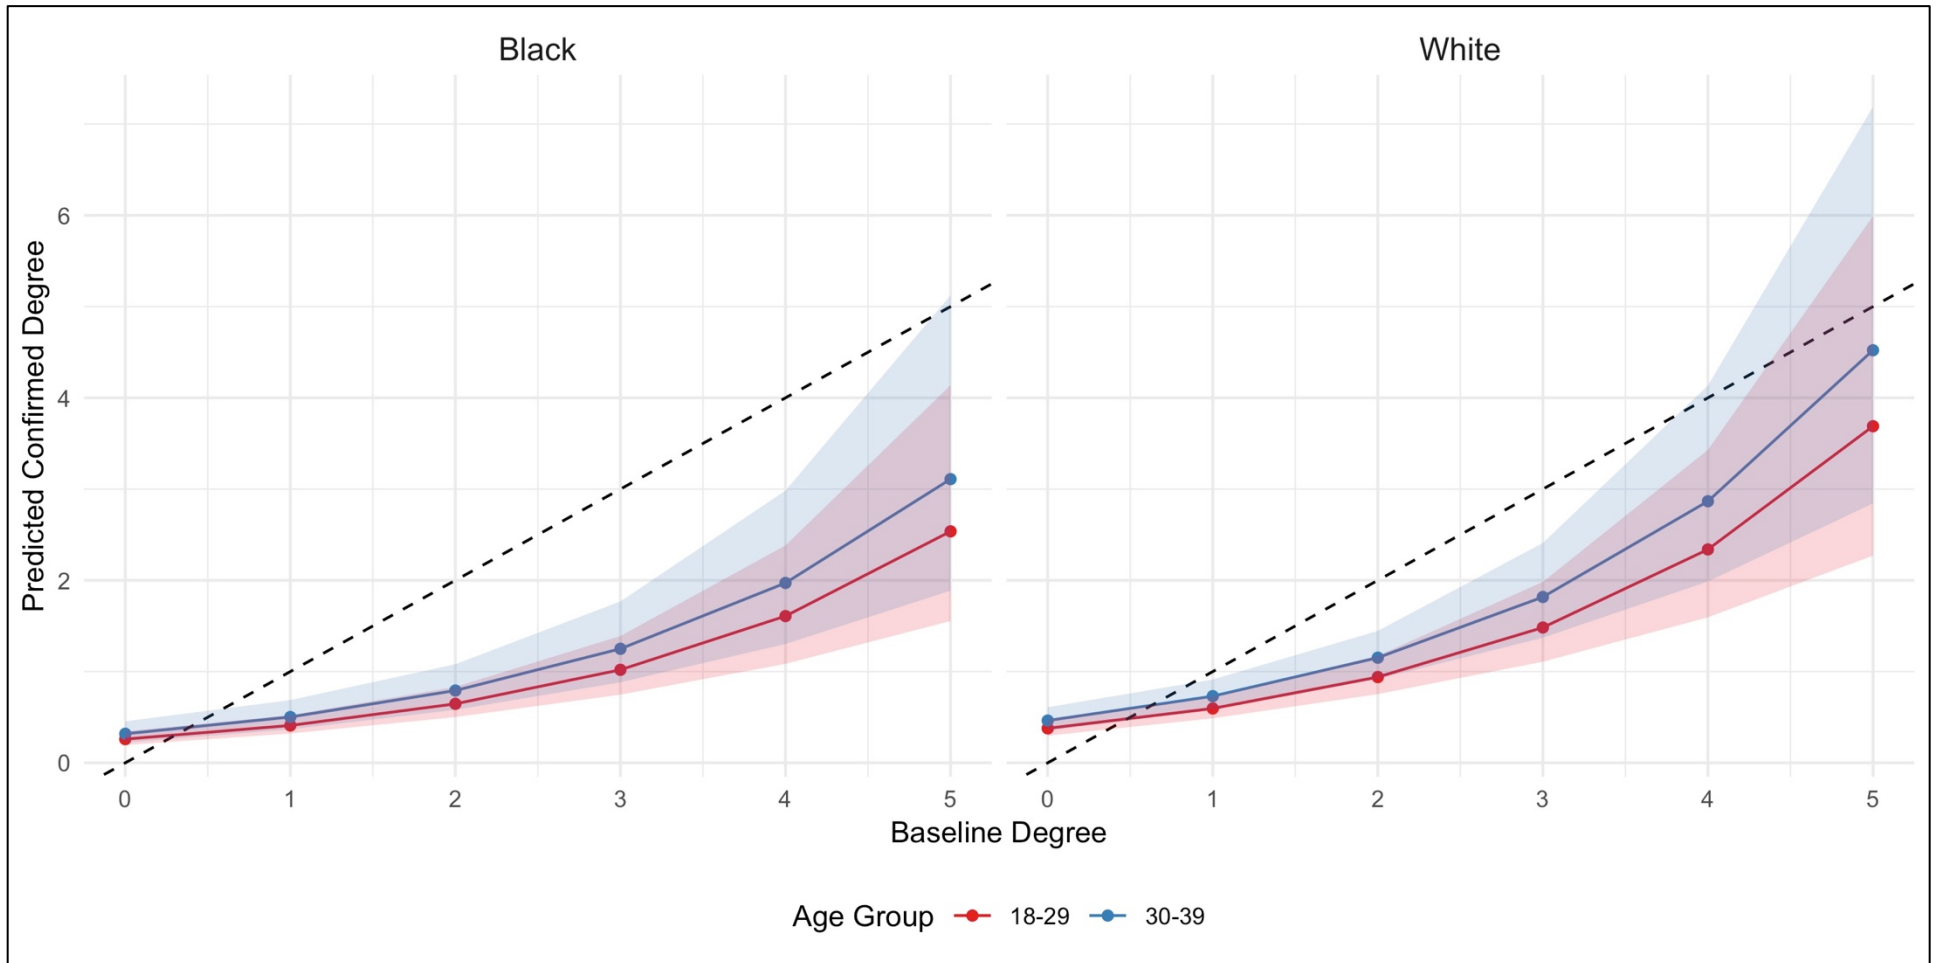

Supplement: NIHMS1063200-supplement-Appendix.pdf [file NIHMS1063200-supplement-Appendix.pdf]
